# Supplementary material
Source: publisher figshare collection journal article supplement (https://acs.figshare.com/ndownloader/files/3741754)
Supplement: Supplementary file 1 [file 3741754]

|    |                                                                                 |    |
|----|---------------------------------------------------------------------------------|----|
| 1  | Supporting Information for:                                                     |    |
| 2  |                                                                                 |    |
| 3  | <b>Capillary Pressure—Saturation Relations for Supercritical CO<sub>2</sub></b> |    |
| 4  | <b>and Brine in Limestone/Dolomite Sands: Implications for</b>                  |    |
| 5  | <b>Geologic Carbon Sequestration in Carbonate Reservoirs</b>                    |    |
| 6  |                                                                                 |    |
| 7  | Shibo Wang and Tetsu K. Tokunaga                                                |    |
| 8  | Earth Sciences Division, Lawrence Berkeley National Laboratory                  |    |
| 9  | 1 Cyclotron Road, Berkeley, California 94720, USA                               |    |
| 10 |                                                                                 |    |
| 11 | <b>Environmental Science and Technology</b>                                     |    |
| 12 |                                                                                 |    |
| 13 | <b>14 pages</b>                                                                 |    |
| 14 | <b>Table of Contents</b>                                                        |    |
| 15 | 1 Porous Media .....                                                            | 2  |
| 16 | 2 Fluids .....                                                                  | 4  |
| 17 | 3 High Pressure Sample Chamber .....                                            | 5  |
| 18 | 4 High Pressure $P_c$ – $S_w$ System .....                                      | 6  |
| 19 | 5 Experimental Procedure .....                                                  | 7  |
| 20 | 5.1 ETP EXPERIMENTS FOR SCCO <sub>2</sub> —BRINE .....                          | 7  |
| 21 | 5.2 RTP EXPERIMENTS FOR AIR—BRINE .....                                         | 9  |
| 22 | 6 Results .....                                                                 | 10 |
| 23 | 7 References .....                                                              | 14 |
| 24 |                                                                                 |    |
| 25 |                                                                                 |    |
| 26 |                                                                                 |    |
| 27 |                                                                                 |    |
| 28 |                                                                                 |    |
| 29 |                                                                                 |    |

## 1 Porous Media

Moderate-sized granular limestone (with 0.1–1.0 percent (wt/wt) quartz, density of 2.71 g/cm<sup>3</sup>; Specialty Minerals Corporation, Lucerne Valley, CA) and dolomite (with 0.1–1.0 percent (wt/wt) quartz and 0.1–1.0 percent (wt/wt) tremolite, density of 2.78 g/cm<sup>3</sup>; Specialty Minerals Corporation, Canaan, CT) sands were sieved, and the 250 to 355  $\mu\text{m}$  size fraction was retained for the measurements (in later capillary scaling analyses, we set the characteristic grain size  $\lambda$  to the median grain size of 302  $\mu\text{m}$ ). All the sieved minerals were rinsed several times in deionized (DI) water only to remove finer particles and possible loosely attached impurities. In order to best preserve the original properties of the minerals and closely simulate natural porous media, no aggressive chemical or physical cleaning (e.g., acetone, ethanol or acid washing, plasma, sonication) was performed. After cleaning, the minerals were dried in oven at 110–120 °C.

Pre- and post-experiment analysis of materials including scanning electron microscope (SEM), X-ray diffraction (XRD) and Brunauer, Emmett and Teller (BET) specific surface area measurements were conducted. SEM (Zeiss Gemini Ultra-55) images were taken to examine surface morphology and roughness of the sand particle samples at nm to  $\mu\text{m}$  scale. Prior to imaging, the sand grains were sputter-coated with gold. As shown in Figure S1, quartz sands are generally well-rounded while limestone sands are more angular. Comparing fresh sands with aged sands during experiments in scCO<sub>2</sub> saturated brine, insignificant changes were observed.

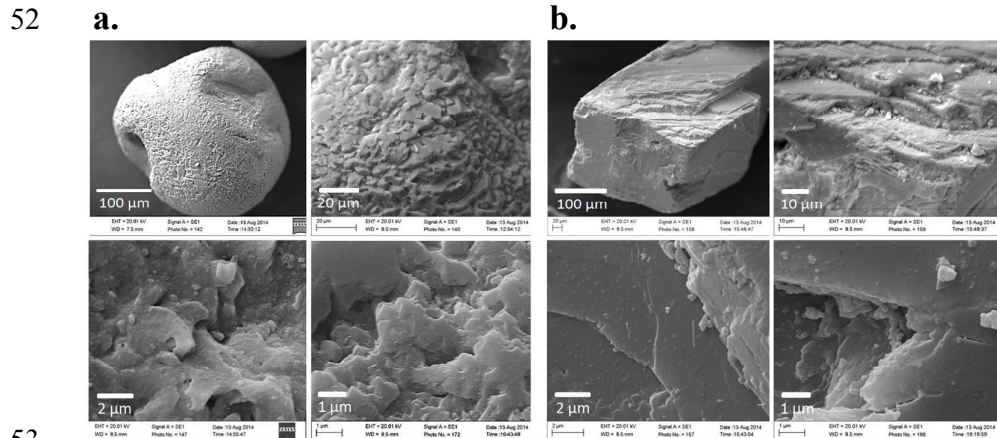

**Figure S1.** Scanning electron microscope (SEM) images of (a) Quartz (SiO<sub>2</sub>) and (b) Limestone (CaCO<sub>3</sub>) sands.

XRD measurements were conducted on quartz, limestone and dolomite sand samples to determine mineral contents. Mineralogical compositions were identified using powder XRD (Rigaku SmartLab X-ray Diffractometer). As shown in Figure

S2, the sand samples used in this study are representative with quartz, limestone and dolomite being the dominant minerals, respectively.

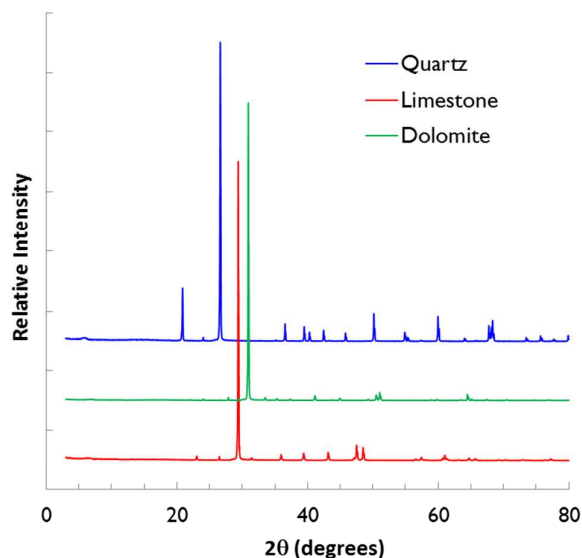

**Figure S2.** X-ray diffraction (XRD) diagrams of Quartz ( $\text{SiO}_2$ ), Limestone ( $\text{CaCO}_3$ ) and Dolomite ( $\text{CaMg}(\text{CO}_3)_2$ ) sands, showing sample mineralogy.

BET measurements were conducted on quartz, limestone and dolomite sands to determine specific surface area, pore size distribution and porosity. The specific surface areas of the samples were measured on an Autosorb-1 surface area analyzer (Quantachrome Instruments) with Krypton (Kr) as the adsorption gas. Prior to the measurements, samples were degassed under vacuum at 150 °C for 3 hours to remove any moisture and adsorbed gas. Surface areas were calculated according to 5 points BET measurements at a relative pressure ranging from 0.05 to 0.3  $P/P_0$  using the classic BET equations. As shown in Table S1, quartz sand has a specific surface area that is about 4 times of that of the carbonate sands. The low specific surface areas, especially for the carbonates show that these sands have insignificant internal porosity.

**Table S1. Brunauer, Emmett and Teller (BET) Specific Surface Area Measurements on Quartz ( $\text{SiO}_2$ ), Limestone ( $\text{CaCO}_3$ ) and Dolomite ( $\text{CaMg}(\text{CO}_3)_2$ ) Sands with Kr as the Adsorption Gas.**

| Sample    | Kr-BET specific surface area, $\text{m}^2/\text{g}$ | r, correlation coefficient |
|-----------|-----------------------------------------------------|----------------------------|
| Quartz    | 0.103                                               | 0.9994                     |
| Limestone | 0.028                                               | 0.9999                     |
| Dolomite  | 0.032                                               | 0.9998                     |

## 2 Fluids

In our experiments, clean CO<sub>2</sub> from a cylinder (99.99% purity, Airgas) was pressurized inside the high pressure syringe pump (500D HP, Teledyne Isco Corp., rated to 34.5 MPa) to its supercritical states under 8.5 and 12.0 MPa, representing reservoir conditions at depths of about 0.85 and 1.2 km. We conducted our own scCO<sub>2</sub>–brine interfacial tension ( $\gamma$ ) measurements using the pendant drop method,<sup>1</sup> under the same conditions for the  $P_c$ – $S_w$  experiments. Our measured values are included in Table S2, along with  $\gamma$  measurements from the literature obtained under similar conditions for comparison.

**Table S2. Pressure and Temperature Dependent Fluid and Interfacial Properties under Our Experimental Conditions.**

| Temperature                                     | °C                                  | 23.5               | 45                    | 45                    |
|-------------------------------------------------|-------------------------------------|--------------------|-----------------------|-----------------------|
| Pressure                                        | MPa                                 | 0.1                | 8.5                   | 12.0                  |
| 1.0 M NaCl brine density, $\rho_w$              | kg·m <sup>-3</sup>                  | 1036 <sup>a</sup>  | 1032 <sup>a</sup>     | 1034 <sup>a</sup>     |
| Nonaqueous fluid phase                          |                                     | air                | scCO <sub>2</sub>     | scCO <sub>2</sub>     |
| Nonaqueous fluid density, $\rho_n$              | kg·m <sup>-3</sup>                  | 1.2                | 282 <sup>b</sup>      | 658 <sup>b</sup>      |
| $\rho_w - \rho_n$                               | kg·m <sup>-3</sup>                  | 1035               | 750                   | 376                   |
| $(\rho_w - \rho_n)g$                            | kg·m <sup>-2</sup> ·s <sup>-2</sup> | 10153              | 7358                  | 3689                  |
| $(\rho_w - \rho_n)g(H/2)$                       | Pa                                  | 152.3 <sup>c</sup> | 73.6 <sup>c</sup>     | 36.9 <sup>c</sup>     |
| Fluid–fluid interfacial tension                 | mN·m <sup>-1</sup>                  | 74.4 <sup>d</sup>  | 33.1±0.5 <sup>e</sup> | 30.1±0.4 <sup>e</sup> |
| Regression for NaCl/KCl brine <sup>5</sup>      |                                     |                    | 39.1 <sup>f</sup>     | 35.1 <sup>f</sup>     |
| 76 g/L synthetic brine (~1 M NaCl) <sup>1</sup> |                                     |                    | 32.7 <sup>g</sup>     | 25.5 <sup>g</sup>     |
| 0.87 M NaCl, interpolated T <sup>6</sup>        |                                     |                    | 33 <sup>h</sup>       | 28 <sup>h</sup>       |

<sup>a</sup>The NaCl brine densities were calculated based on the regression equations of Batzle and Wang.<sup>2</sup>

<sup>b</sup>scCO<sub>2</sub> densities were obtained from CO<sub>2</sub> phase diagram in the National Institute of Standards and Technology (NIST) web-based database (<http://webbook.nist.gov/chemistry/fluid/>).<sup>3</sup>

<sup>c</sup>The  $(\rho_w - \rho_n)g(H/2)$  values represent magnitudes of variations in  $P_c$  relative to the value at the horizontal midplane of the sandpack, associated with ±0.01 m (half the sample height,  $H = 0.02$  m) for scCO<sub>2</sub> and ±0.015 m ( $H = 0.03$  m) for air under hydrostatic equilibrium condition.

<sup>d</sup>Interfacial tension value for 1.0 M NaCl air–brine is from *Weast*.<sup>4</sup>

<sup>e</sup>Interfacial tensions for scCO<sub>2</sub>–brine were measured in our laboratory using the pendant drop method.<sup>1</sup>

<sup>f</sup>Estimated interfacial tensions for experiments with scCO<sub>2</sub> were obtained by applying the regression relations by *Li et al.*,<sup>5</sup> assuming equivalence our NaCl solutions with a solution of monovalent ions comprised primarily of NaCl (86.4%, with 13.6% KCl).

<sup>g</sup>Interfacial tensions for a scCO<sub>2</sub>–brine system with a 76 g/L brine (compared to our 1 M NaCl=58 g/L), at 8 (versus our 8.5) and 12 MPa, 41 °C, from *Bachu and Bennion*.<sup>1</sup>

<sup>h</sup>Interpolated values (measurements at 27 °C and 71 °C) for 0.87 M NaCl by *Chalabaud et al.*<sup>6</sup>

### 3 High Pressure Sample Chamber

The limestone sand sample resided inside a stainless steel chamber (rated to 20.7 MPa). The configuration of the high pressure sand column chamber is shown in Figure S3. A 316 stainless steel porous plate (5  $\mu\text{m}$  pore size for 12 MPa tests and 2  $\mu\text{m}$  for 8.5 MPa tests, 3.0 mm thick, 104.8 mm diameter, Mott Corp.) was fitted into the slot between the top and bottom cavity of the custom built high-pressure vessel (Parr Instrument Co.). The stainless steel ring (internal diameter 82.1 mm, height  $H = 20$  mm) which contains the sand was placed on top of the porous plate. The limestone sand samples were wet-packed with the brine inside the ring to complete WP saturation at  $\phi = 0.38$  (pore volume 42.1 mL). Permeability measurements with 1.0 M NaCl brine obtained on a separate sample of the sand (packed to the same  $\phi$ ) yielded a  $k$  of  $3.9 \times 10^{-11} \text{ m}^2$  (hydraulic conductivity of  $3.9 \times 10^{-4} \text{ m} \cdot \text{s}^{-1}$ ). Equilibrium  $P_c$  at each height  $h$  relative to the midplane was calculated by  $(\rho_w - \rho_n)gh$ . A stainless steel spacer (40 mm thick, 94.7 mm diameter) with 24 flow conduits (3.0 mm diameter) sat on top of the sandpack to compensate the void space volume inside the chamber and to prevent displacement of the sand during pressurization. Buna-N O-rings were used between all the aforementioned parts to ensure that inflow and outflow only occurred through the sandpack and the stainless steel porous plate. A graphite gasket was used in the reactor lid to provide leak-proof sealing and minimize possible contamination. A rupture disc (rated to 20 MPa, Fike Corp.) on the reactor's cap ensured safe venting in the event of accidental over-pressurization. After the chamber was capped with the reactor lid, it was tightened with the bolts of a split ring assembly.

130

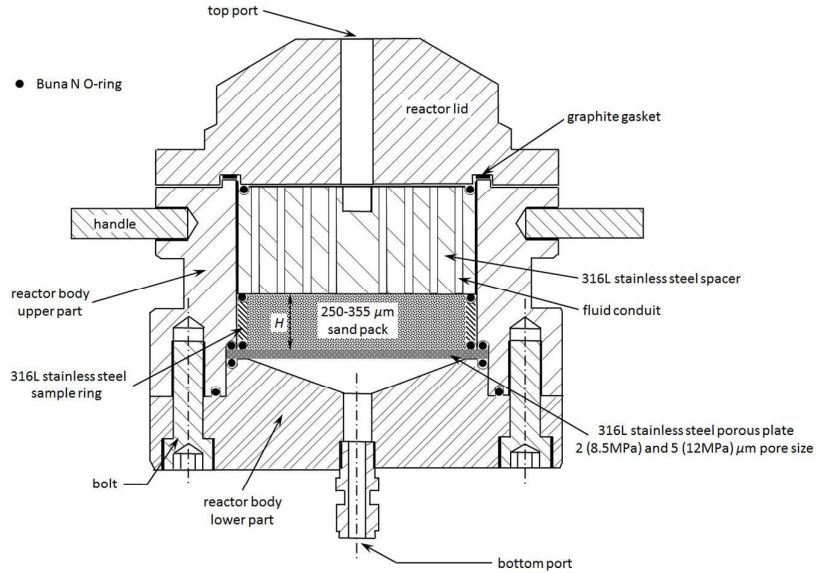

**Figure S3.** High-pressure sample chamber (drawing adapted from original drawing by Parr Instrument Co.). A custom-built high-pressure reaction vessel (Parr Instrument Co.) served as the body of the chamber, with additional components placed in its cavity. The reactor lid is sealed into place with bolts on a pair of split ring clamps (not shown).

#### 4 High Pressure $P_c$ – $S_w$ System

The exterior and interior of the high pressure  $P_c$ – $S_w$  system is shown in Figure S4.  $P_c$  is precisely controlled via a high pressure sight glass  $P_c$  regulator whose height is set by a computer-programmed automatic linear actuator. Constant system temperature is maintained by housing all the components of this system inside a thermally insulated enclosure.

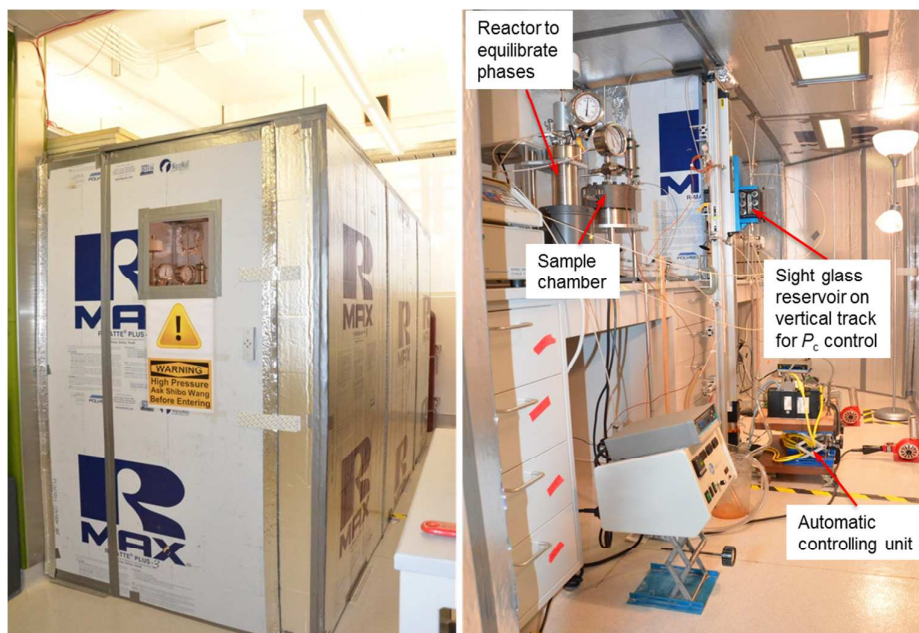

**Figure S4.** Pictures of the exterior (Left) and interior (Right) of the high pressure  $P_c$ – $S_w$  measurement system. The main and back-pressure ISCO pumps are not visible in the picture.

## 5 Experimental Procedure

Before use, the equipment including the syringe pumps, the high pressure cylinder, the sight glass vessel, the porous plates, the sample chambers, valves, connectors, tubing and all the other components used in the ambient pressure and elevated pressure experiments were well cleaned with acetone/ethanol first, then extensively rinsed with DI water and finally flushed with clean air.

### 5.1 ETP Experiments for $\text{scCO}_2$ –Brine

As many of the preparatory steps in the ETP experiments as possible are done at room temperature. It should be noted that later initialization and adjustment steps conducted by working within the thermally insulated enclosure must be done quickly to ensure that heat related health risks are avoided.

Before experiments, about 350 mL brine was added into a stirred high-pressure reactor vessel (4562 Mini Reactor system, Parr Instrument Co., 450 mL, rated to 20 MPa) to prepare brine-saturated  $\text{scCO}_2$  and  $\text{scCO}_2$ -saturated brine. Liquid  $\text{CO}_2$  from the bottom of the  $\text{CO}_2$  cylinder via eductor tube was dispensed into the main syringe pump.  $\text{scCO}_2$  was prepared in the syringe pump and then pumped into the stirred reactor where  $\text{scCO}_2$  and brine were mixed to phase equilibrium for at least

165 48 hours before use. Leak test was carefully conducted at all the ports and valve  
166 and tubing connections to ensure the system is leak proof.

167 When an ETP experiment started, brine-saturated  $\text{scCO}_2$  from the stirred  
168 reactor was first added into the sample chamber through the upper port #1  
169 (connected with the stirred reactor) to fill up the void space on top of the sandpack  
170 and the system's total pressure was maintained at the target value by the main  
171 syringe pump. The valve at the upper port #1 was then closed and the valve at the  
172 lower port, which connected the stirred reactor and the sample chamber, was  
173 opened. The valve at the upper port #2 (connected with the high pressure cylinder  
174 prefilled with  $\text{scCO}_2$  via the back pressure syringe pump) in the sample chamber  
175 was opened and the  $\text{scCO}_2$ -saturated brine was pumped into the sample chamber  
176 from the bottom. The fresh brine in the sand column was thus discharged into the  
177 cylinder and the flushing (replacing the fresh brine from the wet-packing with  
178  $\text{scCO}_2$ -saturated brine) of the sample column ensued under the pressure differential  
179 between the main and backpressure syringe pumps. The sample chamber was  
180 purged with at least 3 pore volumes of  $\text{scCO}_2$ -saturated brine at a rate of about 1–5  
181 mL/min. In this way, the sandpack was set to be fully saturated with the WP (i.e.,  
182 the  $\text{scCO}_2$ -saturated brine). After the flushing was done, the sample chamber was  
183 temporarily isolated from the main loop. Brine-saturated  $\text{scCO}_2$  from the stirred  
184 reactor was filled into the high-pressure  $P_c$ – $S_w$  controller/meter. Next, a small  
185 amount of  $\text{scCO}_2$ -saturated brine was introduced into the high-pressure  $P_c$ – $S_w$   
186 controller/meter in order to bring the  $\text{scCO}_2$ -brine meniscus into view at the bottom  
187 portion of the window (by means of the back-pressured cylinder). The vertical  
188 position of the high-pressure  $P_c$ – $S_w$  controller/meter was adjusted such that the  
189 elevation of the  $\text{scCO}_2$ –brine interface coincided with the center of the sand pack.  
190 This starting condition for  $P_c$ – $S_w$  measurements corresponds to an average  $P_c = 0$   
191 Pa. Finally, the respective top and bottom valves of the sample chamber and the  
192 sight glass vessel were connected, forming a hydraulically closed loop. This loop  
193 was linked to the main syringe pump at the upper port #1 of the sample chamber to  
194 maintain the target experimental total pressures (8.5 or 12.0 MPa). The entire  
195 system was left for equilibration for at least 24 hours prior to data collection. It  
196 should be noted that the  $P_c$  values represent conditions at the horizontal midplane  
197 of the sand sample, and that variations within the column can be as large as  $\pm 73.6$   
198 Pa for 8.5 MPa and  $\pm 36.9$  Pa for 12.0 MPa relative to the midplane value under the  
199 influences of gravity and fluid densities (Table S2).

200 It should be noted that in the drainage–imbibition experiments,  $P_c$  was changed  
201 successively with many equilibration steps while in the separate  $S_{\text{nw},\text{r}}$  vs  $S_{\text{nw},\text{i}}$   
202 experiments, positive (drainage) and negative (imbibition)  $P_c$  was set with only one  
203 equilibration step (i.e., from midplane to desired position for  $S_{\text{nw},\text{i}}$  equilibration  
204 during drainage and from the equilibrated  $S_{\text{nw},\text{i}}$  position directly back to midplane).



## 205 5.2 RTP Experiments for Air–Brine

206 In the air–brine experiments on limestone and dolomite sands under RTP  
207 conditions, experimental procedures were in the most part similar to the ETP  
208 experiments except for the laborious operations of pressure and temperature  
209 maintenance, fluid flushing and backpressure control. A plastic column (92 mm  
210 diameter, height  $H = 30$  mm, Soilmoisture Equipment Corp.) with a ceramic  
211 porous plate (0.05 MPa capillary pressure threshold, 12.7 mm thick, 92 mm  
212 diameter, Soilmoisture Equipment Corp.) was employed. The sand samples were  
213 carefully wet-packed to full brine saturation ( $\phi = 0.38$ , pore volume 63.0 mL,  $k =$   
214  $3.9 \times 10^{-11}$  m<sup>2</sup>) inside the plastic column. The bottom port of the plastic chamber was  
215 connected via polyethylene (PE) tubing to the bottom end of a vertically oriented  
216 50 mL serological pipette (labeled in 1 mL increments, volumes resolution to 0.2  
217 mL, VWR International Corp.). The pipette served the same purpose as the  
218 graduated sight glass in the ETP experiments (i.e., capillary pressure regulator  
219 through adjusting the elevation of the air–brine interface relative to the sample  
220 center as well as a reservoir for measuring outflow/inflow from the sample). The  
221 top port of the plastic column and the upper portion of the pipette were both vented  
222 to the room air (and thus local atmospheric pressure). After wet-packing the  
223 sample, the brine level in the pipette was adjusted to a position within the bottom  
224 portion of the pipette (low volume reading), and hydrostatically equilibrated at the  
225 horizontal midplane of the sand pack for at least 24 hours before measurements.  
226 This configuration allowed equilibration to an average  $P_c = 0$ , with a variation  
227 within the sand pack of  $\pm(\rho_w - \rho_n)g(H/2)$ , which amounted to  $\pm 152$  Pa within the 30  
228 mm column (Table S2). It also enabled fine control of  $P_c$  by setting the level of the  
229 air–brine interface in the pipette at the desired elevation as was previously  
230 described in the scCO<sub>2</sub>–brine experiments. Drainage curves were obtained by  
231 successively moving the air–brine interface in the pipette downward to lower  
232 depths,  $h$ , relative to the horizontal midplane of the sand pack and recording  
233 outflow volumes.<sup>7</sup> Imbibition curves were obtained by reversing this procedure  
234 through a series of stepwise equilibrations, returning to  $P_c = 0$ . Time intervals of 1  
235 to 2 days between equilibration steps were used depending on the stage of  
236 drainage/imbibition. Primary and duplicate/secondary cycles of drainage and  
237 rewetting were conducted.

238

239

240

## 241 6 Results

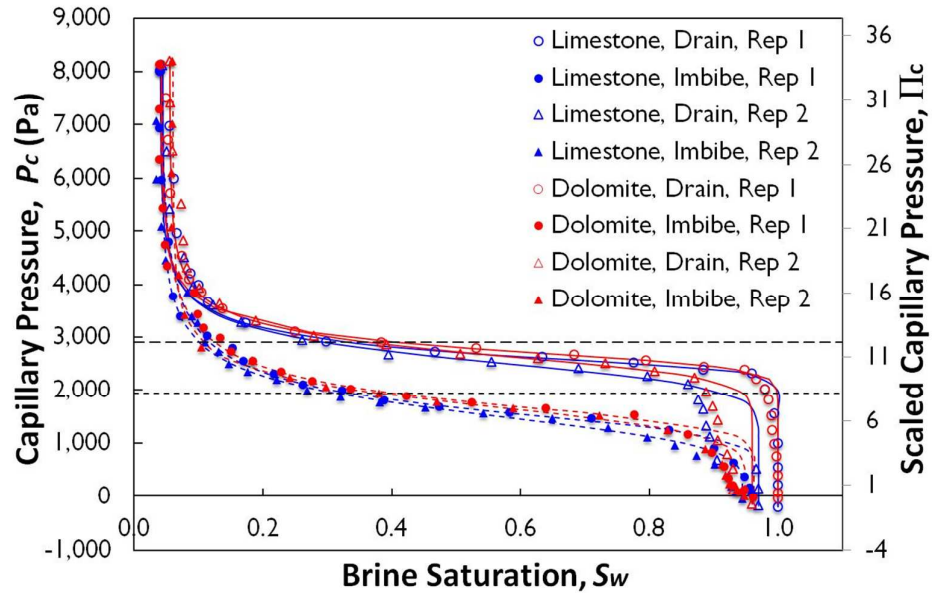

242

243 **Figure S5.**  $P_c$ – $S_w$  relations during drainage and imbibition/rewetting in limestone  
 244 and dolomite sands at RTP. Experiments involving duplicate drainage–imbibition  
 245 cycles were conducted. The sandpacks were saturated with brine (i.e.,  $S_{w,i} = 1.0$  and  
 246  $V_w/V_b = 0.38$ ) prior to the initial drainage cycle. Unscaled  $P_c$ – $S_w$  and capillary-  
 247 scaled with grain size and IFT ( $\Pi_c = \lambda P_c / \gamma$ )  $\Pi_c$ – $S_w$  relations are presented in the  
 248 same plot. Universal values of  $\Pi_c$  inflection points ( $\sim 12$  for drainage and  $\sim 8$  for  
 249 imbibition, noted by the dash lines) are included for comparisons. Values of  $\gamma$  used  
 250 in capillary scaling are listed in Table S2. The continuous curves are the fitted data  
 251 based on van Genuchten model<sup>8</sup> in the nonlinear regression analysis. The fitting  
 252 parameters are summarized in Table S3 and scaling inflections are presented in  
 253 Table S4. “Rep” = Replicate.

254

255

256

257

258

259

260

261

262 **Table S3. Curve Fitting Parameters of van Genuchten Model (Equation 3) to**  
263 **Drainage and Imbibition Curves (Figure S5 and 2)<sup>a</sup>**

|                                                     |            | $\Theta_s$ | $S_s$ | $\Theta_r$ | $S_r$ | $\alpha$ (Pa <sup>-1</sup> ) | n     | m     |
|-----------------------------------------------------|------------|------------|-------|------------|-------|------------------------------|-------|-------|
| Air—limestone—1                                     | Drainage   | 0.380      | 1.00  | 0.015      | 0.04  | $4.09 \times 10^{-4}$        | 26.85 | 0.26  |
|                                                     | Imbibition | 0.366      | 0.96  | 0.015      | 0.04  | $7.15 \times 10^{-4}$        | 7.50  | 0.45  |
| Air—limestone—2                                     | Drainage   | 0.369      | 0.97  | 0.017      | 0.04  | $4.09 \times 10^{-4}$        | 10.30 | 0.68  |
|                                                     | Imbibition | 0.359      | 0.94  | 0.015      | 0.04  | $6.32 \times 10^{-4}$        | 4.60  | 0.95  |
| Air—dolomite—1                                      | Drainage   | 0.380      | 1.00  | 0.015      | 0.04  | $3.91 \times 10^{-4}$        | 21.45 | 0.35  |
|                                                     | Imbibition | 0.366      | 0.96  | 0.015      | 0.04  | $6.54 \times 10^{-4}$        | 8.64  | 0.43  |
| Air—dolomite—2                                      | Drainage   | 0.365      | 0.96  | 0.021      | 0.06  | $3.95 \times 10^{-4}$        | 12.98 | 0.55  |
|                                                     | Imbibition | 0.361      | 0.95  | 0.023      | 0.06  | $5.67 \times 10^{-4}$        | 5.61  | 1.03  |
| 8.5 MPa CO <sub>2</sub> —fresh limestone            | Drainage   | 0.380      | 1.00  | 0.021      | 0.06  | $4.22 \times 10^{-4}$        | 6.47  | 33.62 |
|                                                     | Imbibition | 0.366      | 0.96  | 0.021      | 0.06  | $4.47 \times 10^{-5}$        | 8.35  | 0.30  |
| 8.5 MPa CO <sub>2</sub> —1.5 months aged limestone  | Drainage   | 0.380      | 1.00  | 0.020      | 0.05  | $9.41 \times 10^{-4}$        | 4.96  | 2.48  |
|                                                     | Imbibition | 0.340      | 0.89  | 0.020      | 0.05  | $4.01 \times 10^{-3}$        | 7.44  | 0.46  |
| 12.0 MPa CO <sub>2</sub> —fresh limestone           | Drainage   | 0.380      | 1.00  | 0.015      | 0.04  | $1.59 \times 10^{-3}$        | 19.24 | 0.47  |
|                                                     | Imbibition | 0.284      | 0.75  | 0.015      | 0.04  | $1.06 \times 10^{-3}$        | 2.25  | 33.61 |
| 12.0 MPa CO <sub>2</sub> —1.5 months aged limestone | Drainage   | 0.380      | 1.00  | 0.016      | 0.04  | $2.54 \times 10^{-3}$        | 46.82 | 0.13  |
|                                                     | Imbibition | 0.339      | 0.89  | 0.015      | 0.04  | $5.74 \times 10^{-4}$        | 2.30  | 74.64 |
| 12.0 MPa CO <sub>2</sub> —4 months aged limestone   | Drainage   | 0.380      | 1.00  | 0.028      | 0.07  | $1.71 \times 10^{-3}$        | 3.92  | 2.61  |
|                                                     | Imbibition | 0.263      | 0.69  | 0.028      | 0.07  | $1.76 \times 10^{-2}$        | 3.27  | 0.58  |

264 <sup>a</sup>Note that curves were fitted to minimize root-mean-square deviations to the full drainage  
265 or imbibition curves instead of forcing through data at  $P_c = 0$ .

266  
267  
268  
269  
270  
271  
272  
273  
274  
275  
276  
277

278 **Table S4. Calculated Inflection Matric Heads from Capillary Scaling and**  
279 **Experimental Inflection Matric Heads from Measurements.  $w$  and  $\theta$  Values**  
280 **that Satisfactorily Match Our Experimental Results with the Universal**  
281 **Scaling Inflections at RTP, 8.5 and 12.0 MPa are Listed, Respectively.**

|                                                     |            | Theoretical inflection<br>head, cm | Experimental inflection<br>head, cm | Experimental scaled<br>inflections | Advancing/receding<br>contact angle $\theta$ , ° | $w$ ( $\approx \cos \theta$ ) |
|-----------------------------------------------------|------------|------------------------------------|-------------------------------------|------------------------------------|--------------------------------------------------|-------------------------------|
| Air—limestone—1                                     | Drainage   | 29.1                               | 26.3                                | 11.1                               | 23.0                                             | 0.92                          |
|                                                     | Imbibition | 19.4                               | 16.2                                | 6.8                                | 32.0                                             | 0.85                          |
| Air—limestone—2                                     | Drainage   | 29.1                               | 25.3                                | 10.6                               | 28.0                                             | 0.88                          |
|                                                     | Imbibition | 19.4                               | 15.8                                | 6.6                                | 34.0                                             | 0.83                          |
| Air—dolomite—1                                      | Drainage   | 29.1                               | 27.6                                | 11.6                               | 15.0                                             | 0.97                          |
|                                                     | Imbibition | 19.4                               | 17.8                                | 7.5                                | 20.0                                             | 0.94                          |
| Air—dolomite—2                                      | Drainage   | 29.1                               | 26.9                                | 11.3                               | 20.0                                             | 0.94                          |
|                                                     | Imbibition | 19.4                               | 17.0                                | 7.1                                | 27.0                                             | 0.89                          |
| 8.5 MPa CO <sub>2</sub> —fresh limestone            | Drainage   | 17.9                               | 17.8                                | 11.9                               | 7.0                                              | 0.99                          |
|                                                     | Imbibition | 11.9                               | 4.0                                 | 2.7                                | 70.5                                             | 0.33                          |
| 8.5 MPa CO <sub>2</sub> —1.5 months aged limestone  | Drainage   | 17.9                               | 11.6                                | 7.8                                | 49.5                                             | 0.65                          |
|                                                     | Imbibition | 11.9                               | 4.0                                 | 2.7                                | 70.5                                             | 0.33                          |
| 12.0 MPa CO <sub>2</sub> —fresh limestone           | Drainage   | 32.4                               | 18.1                                | 6.7                                | 56.0                                             | 0.56                          |
|                                                     | Imbibition | 21.6                               | 4.5                                 | 1.7                                | 78.0                                             | 0.21                          |
| 12.0 MPa CO <sub>2</sub> —1.5 months aged limestone | Drainage   | 32.4                               | 11.8                                | 4.4                                | 68.6                                             | 0.36                          |
|                                                     | Imbibition | 21.6                               | 6.6                                 | 2.4                                | 72.3                                             | 0.30                          |
| 12.0 MPa CO <sub>2</sub> —4 months aged limestone   | Drainage   | 32.4                               | 11.8                                | 4.4                                | 68.6                                             | 0.36                          |
|                                                     | Imbibition | 21.6                               | 1.9                                 | 0.7                                | 85.0                                             | 0.09                          |

282

283

284

285

286

287

288

289

290

291

292

293

294

295

296

297

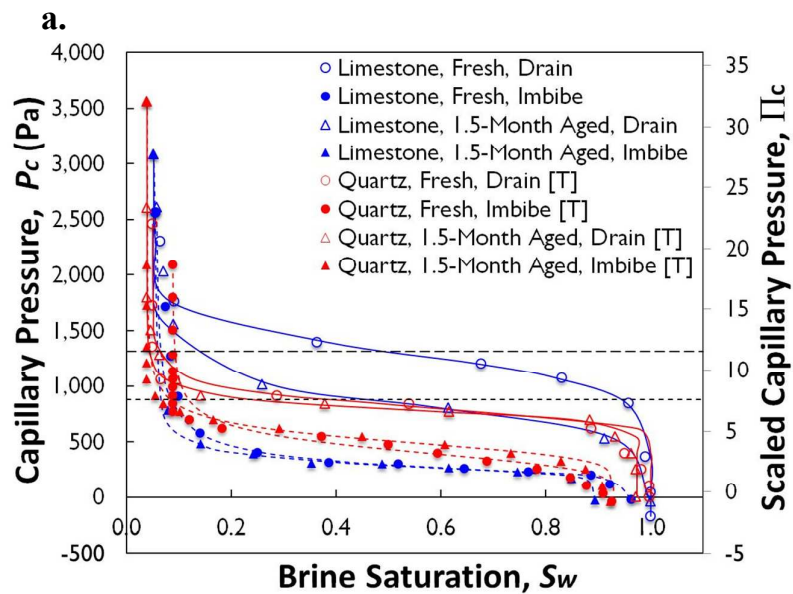

298

299

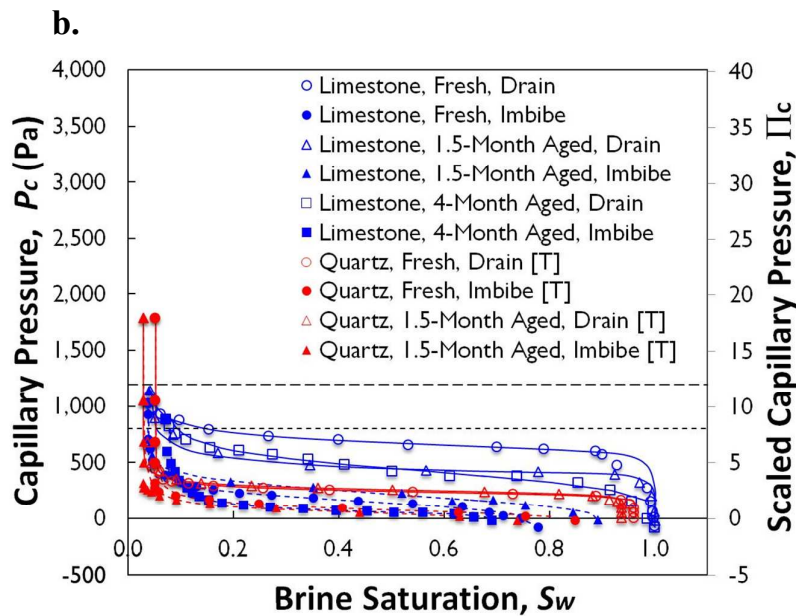

300

301 **Figure S6.**  $P_c$ – $S_w$  relations during drainage and imbibition in limestone and quartz  
 302 sands with scCO<sub>2</sub> at (a) 8.5 and (b) 12.0 MPa, 45 °C. Capillary-scaled  $\Pi_c$   
 303 dependence on brine saturation was also presented with universal scaling  
 304 inflections (straight dash lines) included for comparison. The data were fit with the  
 305 van Genuchten model.<sup>8</sup> The data of quartz were from previous study<sup>9</sup> and were  
 306 denoted as [T] in the figures.

## 307    **7    References**

- 308    1. Bachu, S.; Bennion, D. B. Interfacial tension between CO<sub>2</sub>, freshwater, and brine  
 309    in the range of pressure from (2 to 27) MPa, temperature from (20 to 125) degrees  
 310    C, and water salinity from (0 to 334 000) mg L<sup>-1</sup>. *Journal of Chemical and*  
 311    *Engineering Data* **2009**, 54(3), 765–775.
- 312    2. Batzle, M.; Wang, Z. Seismic properties of pore fluids. *Geophysics* **1992**,  
 313    57(11), 1396–1408.
- 314    3. National Institute of Standards and Technology (NIST) web-based database:  
 315    <http://webbook.nist.gov/chemistry/fluid/>. as of April 2015.
- 316    4. Weast, R. C. CRC Handbook of Chemistry and Physics, 58 ed. **1977**, F-43, CRC  
 317    Press, Cleveland, Ohio.
- 318    5. Li, X.; Boek, E.; Maitland, G. C.; Trusler, J. P. M. Interfacial tension of  
 319    (brines+CO<sub>2</sub>): 0.864 NaCl + 0.136 KCl) at temperatures between (298 and 448) K,  
 320    pressures between (2 and 50) MPa, and total molalities of (1 to 5) mol kg<sup>-1</sup>, *Journal*  
 321    *of Chemical and Engineering Data* **2012**, 57(4), 1078–1088.
- 322    6. Chalbaud, C.; Robin, M.; Lombard, J.-M.; Bertin, H.; Egermann, P. Brine/CO<sub>2</sub>  
 323    interfacial properties and effects on CO<sub>2</sub> storage in deep saline aquifers. *Oil and*  
 324    *Gas Science and Technology* **2010**, 65(4), 541–555.
- 325    7. Tokunaga, T. K.; Wan, J.; Olson, K. R. Saturation-matric potential relations in  
 326    gravel. *Water Resources Research* **2002**, 38, 1214.
- 327    8. van Genuchten, M. T. A closed-form equation for predicting the hydraulic  
 328    conductivity of unsaturated soils. *Soil Science Society of America Journal* **1980**,  
 329    44(5), 892-898.
- 330    9. Tokunaga, T. K.; Wan, J.; Jung, J. W.; Kim, T. W.; Kim, Y.; Dong, W. Capillary  
 331    pressure and saturation relations for supercritical CO<sub>2</sub> and brine in sand: High-  
 332    pressure P<sub>c</sub>(S<sub>w</sub>) controller/meter measurements and capillary scaling predictions.  
 333    *Water Resources Research* **2013**, 49(8), 4566-4579.
